# Supplementary material
Source: publisher site journal article supplement (https://www.dovepress.com/article/581831)
Supplement: Supplementary file 1 [file Supplemental%20material.docx]

Supplemental material

Table S1. Exclusion criteria

| 1 | Individuals that are being treated for cancer or have a history of facial skin cancer on the test areas. |
| --- | --- |
| 2 | Individuals with sunburn, moderate to pronounced suntan, significant asymmetrical skin aging, uneven skin tones, tattoos, significant scars or other disfiguration, inflammatory |
| 3 | Rosacea or other conditions on the test area that might influence the test results. |
| 4 | Individuals currently taking certain medications which in the opinion of the investigators may interfere with the Study. This would include but not be limited to routine high dosage use of anti-inflammatory drugs (aspirin, ibuprofen, corticosteroids (steroid nose drops, inhalers and/or eye drops are permitted)), and immunosuppressive drugs |
| 5 | Individuals with self-reported, uncontrolled systemic disease which, in the opinion of the investigator, may hinder either the individual’s ability to perform all responsibilities of the trial or the investigator’s ability to perform assessments. |
| 6 | Women known to be pregnant, nursing or planning to become pregnant. |
| 7 | Individuals participating in other facial clinical studies |
| 8 | Individuals who have routinely used an alpha-hydroxy-acid (AHA) or a beta-hydroxy-acid (BHA) containing product within two weeks or Retin-A®, Retin-A Micro®, Renova®, Differin®, Avita®, Tazorac®, or Soriatane® within 8 weeks of the Study start or have taken Accutane® within one year of the Study start. Individuals who have used Retinol in the last 8 weeks. |
| 9 | Individuals with current flaring moderate to severe inflammatory acne |
| 10 | Individuals who have had ablative laser treatments, microneedling, and/or chemical peels or dermabrasion within the last six months. |
| 11 | Individuals who have had non-ablative laser treatments or IPL within the last12 weeks. |
| 12 | Individuals with known allergies to skin treatment products or cosmetics, toiletries, and/or topical drugs. |
| 13 | Individuals currently using topically applied prescription medications on the face. |
